# Supplementary material for: A highly diverse Pennsylvanian tetrapod ichnoassemblage from the Semily Formation (Krkonoše Piedmont Basin, Czechia)
Source: PeerJ. 2026 Jan 9;14:e20437. doi: 10.7717/peerj.20437 (PMC12794637; doi:10.7717/peerj.20437)
Supplement: Supplemental Information 1 — Measurements (in mm) obtained from the selected studied fossil tracks. Abbreviations: L = length of track, W= width of track, I–IV = length of digits I–V, *track parameters were calculated as average values. All specimens were measured using a manual calliper. Specimens MZM Ge34174, MZM Ge34176, and MZM Ge34184 were remeasured from photographs using ImageJ software. [file peerj-14-20437-s001.xlsx]

## Sheet: List1
Tab. 1: Track parameters. Measurements (in mm) obtained from the selected studied fossil tracks.
Ichnogenera	Specimen	manus/pes	L	W	I	II	III	IV	V
Amphisauropus	CGS JZ632	m	9	11.2	2.6	3.6	3.9	4	2.7
		p	-	-	2.8	4.4	-	-	-
		m	8.8	11.7	2.4	3.6	3.7	3.9	3.1
Batrachichnus	MZM Ge31124	m	18.8	22.3	6.9	9.8	10.7	6.7
		p	23.1	25.4	5.1	6.7	9.1	19.8	7.3
	ČGS XA738 *	m	12.5	16.2	3.4	4.7	5.3	3.8
		p	15.2	17.3	4.4	4.5	6.8	8	5.1
Dimetropus	NPM P307	m	46?	-	-	-	-	13.8	13.2
		p	93.1	69.3	18.1	24.1	29.9	-	27.9
Dromopus	NM M4949a *	m	23.5	17.3	5.3	6	8.6	12.7	6.5
		p	29.5	25	6.7	10.2	15.1	24.2	8.5
	ČGS XA742	p	69.9	60.8	16.9	25.3	29	44.4	18
		p	60.7	55.6	12.3	15.3	28.8	43.8	19.2
	MZM Ge34176 *	p	43.2	30	9.6	12.4	17.9	30.8	16
		p
Ichniotherium	MZM Ge34184	m	84.6	-	21.3	30.2	34.7	42.2?	-
		p	134.5	115.1	28	38.8	45.1	58.6	-
		m	87.1	86.3	19.5	26.1	36.3	40	22.3
	CGS XA737	m	40.3	53.1	15.6	18.2	20.8	23.4	19.8
		p	63.2	-	18.7	20.5	29.4	35	-
	NPM P103	p	117.5	120.8	32.2	46.4	56.6	61.2	38.2
	NPM P307	p	132.4	132.6	16.2	28.9	40.6	50.1	27.6
Limnopus	MZM Ge34174	m	71.9	112.6	17	19.4	24.7	20.2
	CGS XA741	m	21.3	31.1	8.9	11	12.2	10.8
		p	-	-	7.4	14.4	18.9	-	-
	NPM P3573	m	12	20.1	2.5	3.9	4.9	4.3
		p	21.6	19.8	5	7.1	8.6	11.3	6.6
Abbreviations: L= length of track, W= width of track, I-IV = length of digits I-V, * track parameters were calculated as average values.
All specimens were measured using a manual calliper. Specimens MZM Ge34174, MZM Ge34176, and MZM Ge34184 were remeasured from photographs using ImageJ software.
